# Supplementary material for: PPAR-γRegulates Trophoblast Differentiation in the BeWo Cell Model
Source: Hindawi journal article supplement (doi:10.1155/2014/637251), 2014-01-01
Supplement: f1 [file 637251.f1.zip]

**Supplementary Table 1. Antibodies and dilutions.**

| Antigen           | Origin | Size (kDa) | Dilution                     | Supplier                                     |
|-------------------|--------|------------|------------------------------|----------------------------------------------|
| HO-1              | Rabbit | 32         | 1:500 (WB)                   | Enzo Life Sciences<br>Burlington, ON, Canada |
| PPAR- $\gamma$    | Rabbit | 54-57      | 1:100 (WB)<br>1:100 (F-IHC)  | SantaCruz Biotechnology<br>Dallas, TX, USA   |
| E-cadherin        | Mouse  | 110        | 1:1000 (WB)<br>1:100 (F-IHC) | Abcam<br>Toronto, ON, Canada                 |
| Lamin B           | Mouse  | 67         | 1:500 (WB)                   | SantaCruz Biotechnology<br>Dallas, TX, USA   |
| $\alpha$ -Tubulin | Mouse  | 50         | 1:2000 (WB)                  | Sigma<br>Oakville, ON, Canada                |

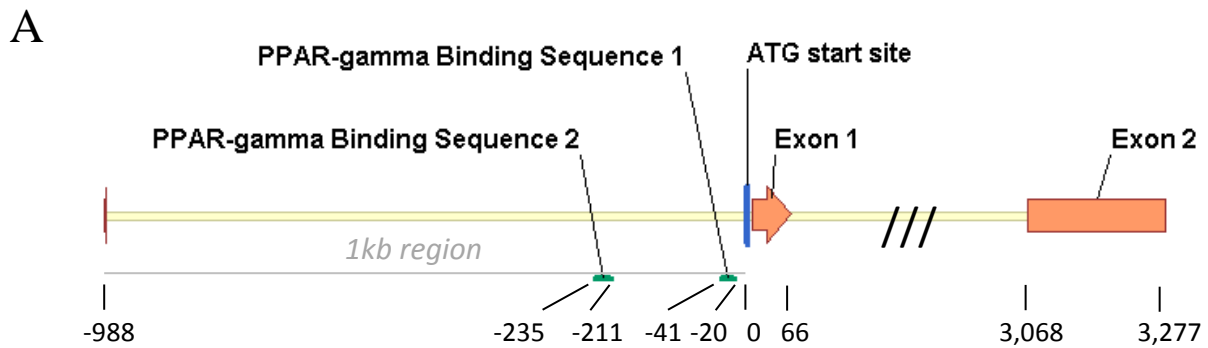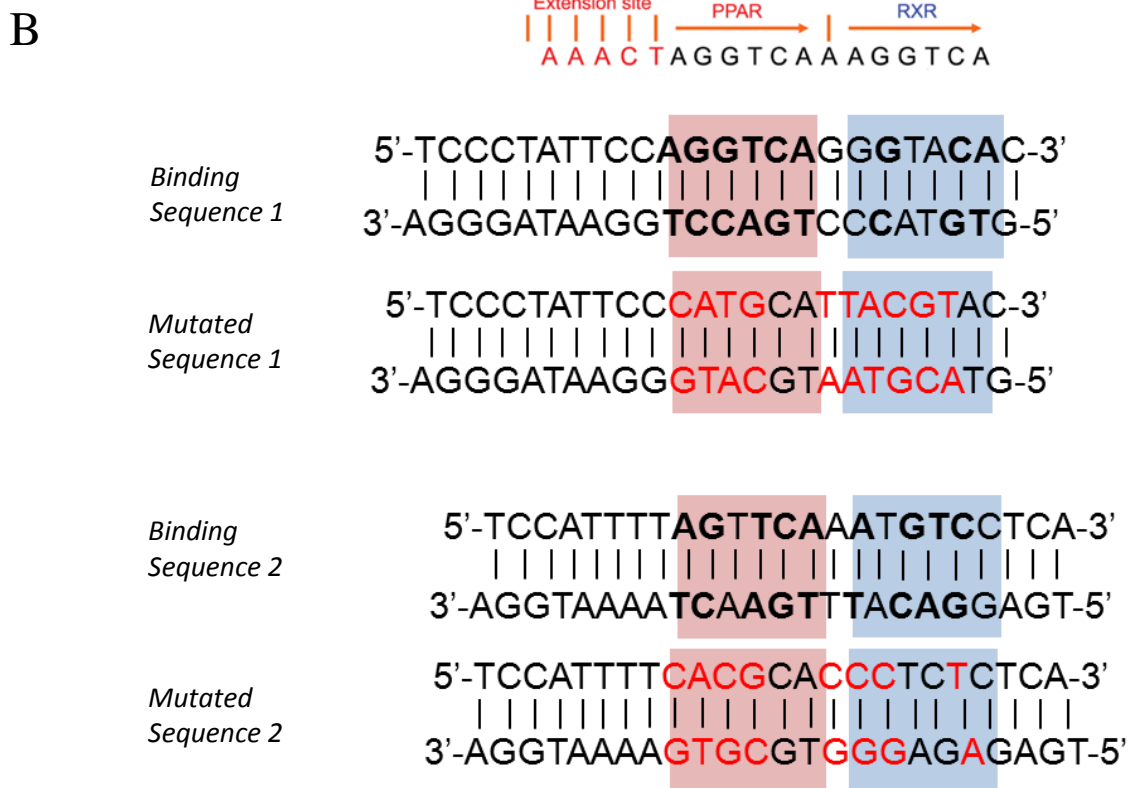

**Supplementary Figure 1. PPAR- $\gamma$  response element (PPRE) identification and binding and mutated sequence design.** (A) Gene map of the 1kb upstream region of the human *GCM-1*. The 1kb region upstream of the human *GCM-1* gene was analyzed for PPAR- $\gamma$  binding sites. Two putative PPREs were found within 250 base pairs from the transcription start site (sequence 1 and sequence 2). The gene map shows only exons 1 and 2 of *GCM-1* gene (not to scale). (B) Duplex oligonucleotide sequences for binding and mutated sequence 1 (top) and binding and mutated sequence 2 (bottom). Nucleotides conserved between the consensus PPRE (shown above for comparison) and our identified binding sites are bolded. Mutated nucleotides are shown in red. PPAR- $\gamma$  binding site is highlighted in pink, RXR- $\alpha$  binding site shown in blue.

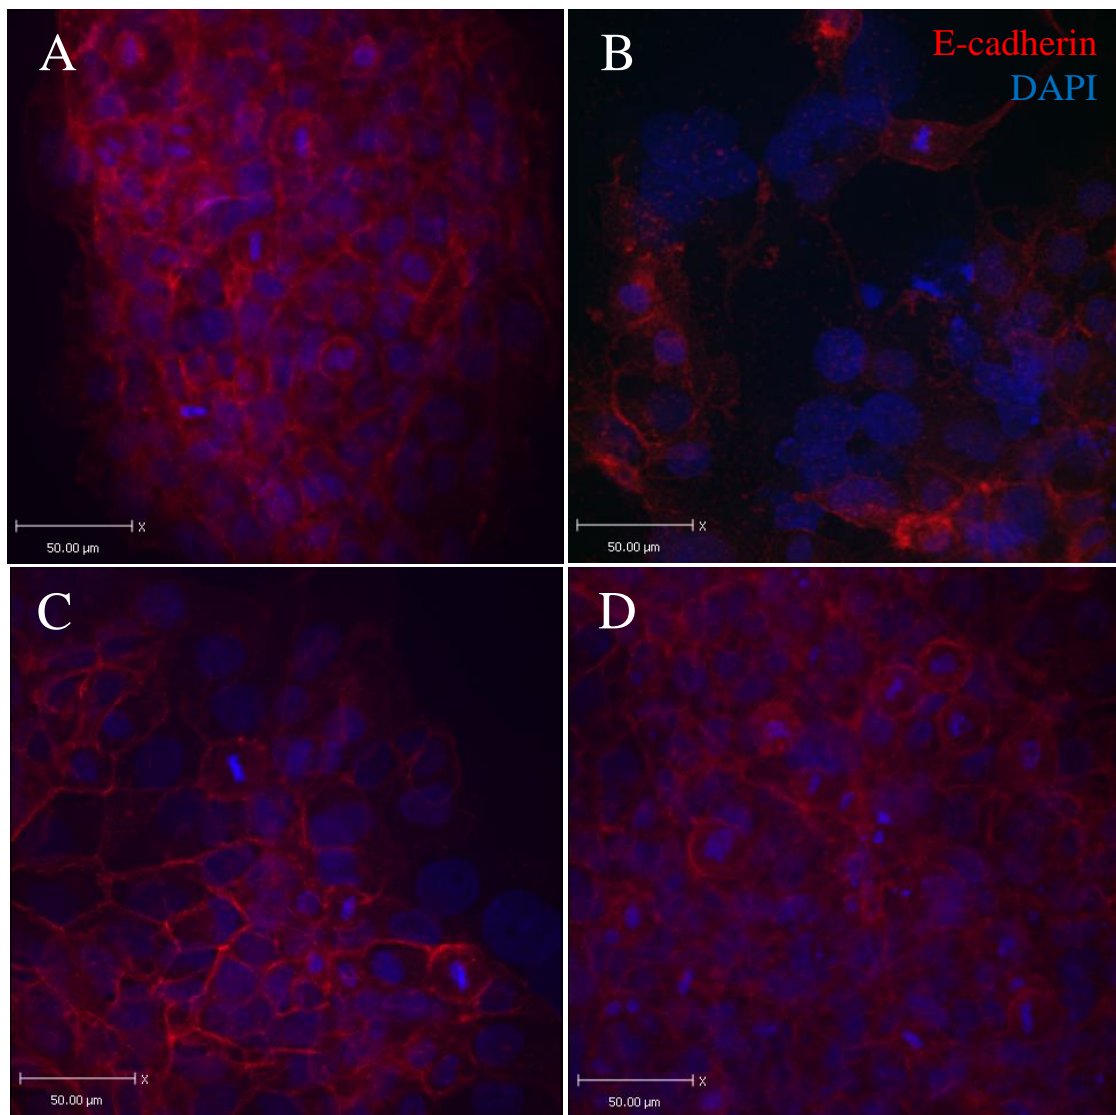

**Supplementary Figure 2. Effect of PPAR- $\gamma$  modulation on BeWo cell fusion.** Cell fusion was assessed at 48 hours post-treatment. Cells were treated with forskolin (**B**) as a positive cell-fusion control, rosiglitazone (**C**), and T0070907 (**D**) and compared to vehicle control (**A**). E-cadherin (red) was used as a cell surface marker; DAPI (blue) was used as the nuclear stain (200X magnification).
