# Supplementary material for: PPAR-γ Regulates Trophoblast Differentiation in the BeWo Cell Model
Source: PPAR Res. 2014 Feb 23;2014:637251. doi: 10.1155/2014/637251 (PMC3953466; doi:10.1155/2014/637251)
Supplement: Supplementary file 1 — Supplementary Material contains information which supports or further explains the findings of this manuscript. Included in this report are the Methods table (Supplementary Table 1) and figure (Supplementary Figure 1) outlining antibodies utilized for this study and plasmid design, respectively; as well as the Results supporting figures, specifically: findings supporting our ability of induction of PPAR-γ transcriptional activity via HO-1 as a downstream target (Supplementary Figure 2); the response of primary cytotrophoblast cells to PPAR-γ activity-modulating drugs (Supplementary Figure 3); and the morphological assessment of BeWo cell fusion in response to these treatments (Supplementary Figure 4). [file 637251.f1.zip]

Archive with 3 entries (2 files):
- 637251.f1/
- 637251.f1/mat.637251.v1.pdf
- 637251.f1/mat.637251.v2.pdf
